# Supplementary material for: ERO1-independent production of H2O2 within the endoplasmic reticulum fuels Prdx4-mediated oxidative protein folding
Source: PubMed Central journal article supplement — J Cell Biol. 2015 Oct 26;211(2):253–9. doi: 10.1083/jcb.201506123 (PMC4621842; doi:10.1083/jcb.201506123), 2015-10-26
Supplement: supp_jcb.201506123_JCB_201506123_sm.pdf [file supp_jcb.201506123_JCB_201506123_sm.pdf]

Konno et al., <http://www.jcb.org/cgi/content/full/jcb.201506123/DC1>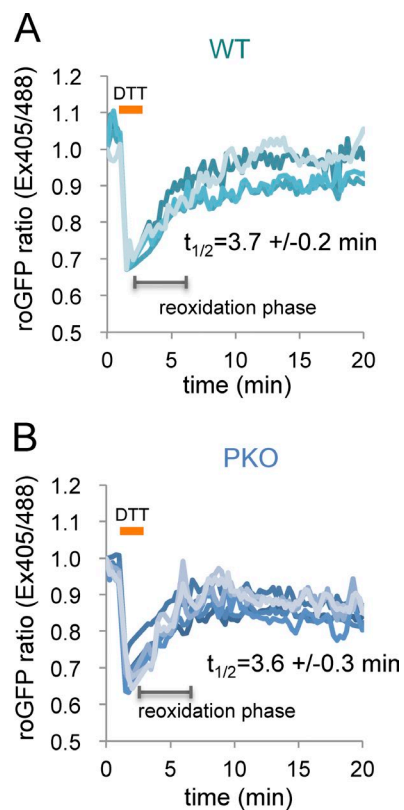

Figure S1. **No evidence for a contribution of PRDX4 to the rate of disulfide bond formation in ERO1-expressing cells.** (A and B) Traces of time-dependent changes in the fluorescence excitation ratio, reflecting the alterations in the oxidation state of roGFP2 expressed in the ER of PKO mouse lung fibroblasts or their isogenic control (WT). Cells were exposed to a brief (1 min) reductive pulse (DTT, 2 mM) followed by a washout. Each line traces the ratio in an individual cell (values shown denote mean recovery  $t_{1/2} \pm$  SEM,  $n > 10$ ).

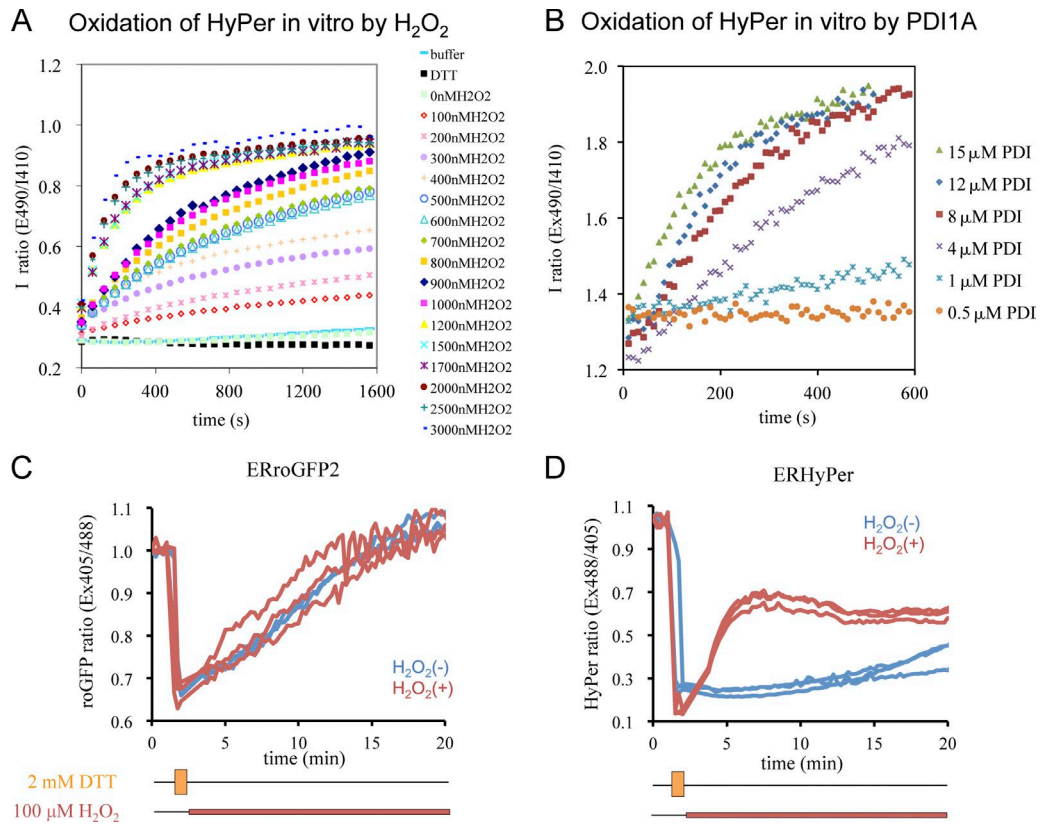

Figure S2. **Kinetics of HyPer oxidation by H<sub>2</sub>O<sub>2</sub> or PDI in vitro and in vivo.** (A and B) Trace of time-dependent changes in the fluorescence excitation ratio of reduced HyPer (1 mM) exposed to the indicated concentrations of H<sub>2</sub>O<sub>2</sub> (A) or oxidized PDI (B) in vitro and of roGFP2 (C) or HyPer (D) expressed in the ER of cells lacking ERO1 and PRDX4 (MEF<sup>TKO</sup>); a brief (1 min) reductive pulse (DTT, 2 mM) was followed by a washout, during which H<sub>2</sub>O<sub>2</sub> (100 mM) was added. Shown are traces of the ratio in individual cells. WT, wild type.

Table S1. List of plasmids

| ID <sup>a</sup> | Plasmid name                   | Description                                                                                       | Reference                                     | First appearance | Label in figure        |
|-----------------|--------------------------------|---------------------------------------------------------------------------------------------------|-----------------------------------------------|------------------|------------------------|
| 1052            | FLAGM1_roGFP2_pCDNA3.1         | Mammalian expression, ER-localized roGFP2                                                         | Tsunoda et al., 2014                          | Fig. 1           | ERroGFP2               |
| 1187            | mPRDX4_37-274_WT_pFLAG_CMV1    | Mammalian expression of mouse PRDX4                                                               | This study                                    | Fig. 1           | PRDX4 <sup>wt</sup>    |
| 1188            | mPRDX4_37-274_C127S_pFLAG_CMV1 | Mammalian expression of mouse PRDX4 inactive mutant                                               | This study                                    | Fig. 1           | PRDX4 <sup>C127S</sup> |
| 233             | hPDI(18-508)pTrcHis-A          | Bacterial expression of human PDI1A                                                               | Zito et al., 2010                             | Fig. 2           | PDI                    |
| 778             | pHyper_pQE30                   | Bacterial expression HyPer                                                                        | Belousov et al., 2006                         | Fig. 2           | HyPer                  |
| 855             | pFLAG_ERHyPerA233V_CMV1        | Mammalian expression, cytosolic HyPer2                                                            | This study, based on Markvicheva et al., 2011 | Fig. 2           | ERHyPer                |
| 1361            | Cyto HyPer_A233V               | Mammalian expression, mitochondrial HyPer2                                                        | This study, based on Markvicheva et al., 2011 | Fig. 3           | cytoHyPer              |
| 1362            | Mito HyPer_A233V               | Mammalian expression, ER targeted HyPer2                                                          | This study, based on Markvicheva et al., 2011 | Fig. 3           | mitoHyPer              |
| 1402            | hCatase_cyto_pCEFL_mCherry     | Mammalian expression of cytosolic human catalase and mCherry from separate promoters              | This study                                    | Fig. 4           | cytoCat                |
| 1404            | hCatase_mito_pCEFL_mCherry     | Mammalian expression of mitochondrial human catalase and mCherry from separate promoters          | This study                                    | Fig. 4           | mitoCat                |
| 1438            | hCatase_ER_pCEFL_mCherry       | Mammalian expression of ER human catalase and mCherry from separate promoters (ER active variant) | This study, based on Lortz et al., 2015       | Fig. 4           | ERCat                  |

<sup>a</sup>Unique plasmid identification number used internally (a lab number).

## References

- Belousov, V.V., A.F. Fradkov, K.A. Lukyanov, D.B. Staroverov, K.S. Shakhbazov, A.V. Terskikh, and S. Lukyanov. 2006. Genetically encoded fluorescent indicator for intracellular hydrogen peroxide. *Nat. Methods*. 3:281–286. <http://dx.doi.org/10.1038/nmeth866>
- Lortz, S., S. Lenzen, and I. Mehmeti. 2015. N-glycosylation-negative catalase: a useful tool for exploring the role of hydrogen peroxide in the endoplasmic reticulum. *Free Radic. Biol. Med.* 80:77–83. <http://dx.doi.org/10.1021/bi800498g>
- Markvicheva, K.N., D.S. Bilan, N.M. Mishina, A.Y. Gorokhovatsky, L.M. Vinokurov, S. Lukyanov, and V.V. Belousov. 2011. A genetically encoded sensor for H<sub>2</sub>O<sub>2</sub> with expanded dynamic range. *Bioorg. Med. Chem.* 19:1079–1084. <http://dx.doi.org/10.1016/j.bmc.2010.07.014>
- Tsunoda, S., E. Avezov, A. Zyryanova, T. Konno, L. Mendes-Silva, E. Pinho Melo, H.P. Harding, and D. Ron. 2014. Intact protein folding in the glutathione-depleted endoplasmic reticulum implicates alternative protein thiol reductants. *eLife*. 3:e03421.
- Zito, E., E.P. Melo, Y. Yang, Å. Wahlander, T.A. Neubert, and D. Ron. 2010. Oxidative protein folding by an endoplasmic reticulum-localized peroxiredoxin. *Mol. Cell*. 40:787–797. <http://dx.doi.org/10.1016/j.molcel.2010.11.010>
